# Supplementary material
Source: PubMed Central journal article supplement (PMC2971611)
Supplement: pp.110.162172_1.pdf [file pp.110.162172_1.pdf]

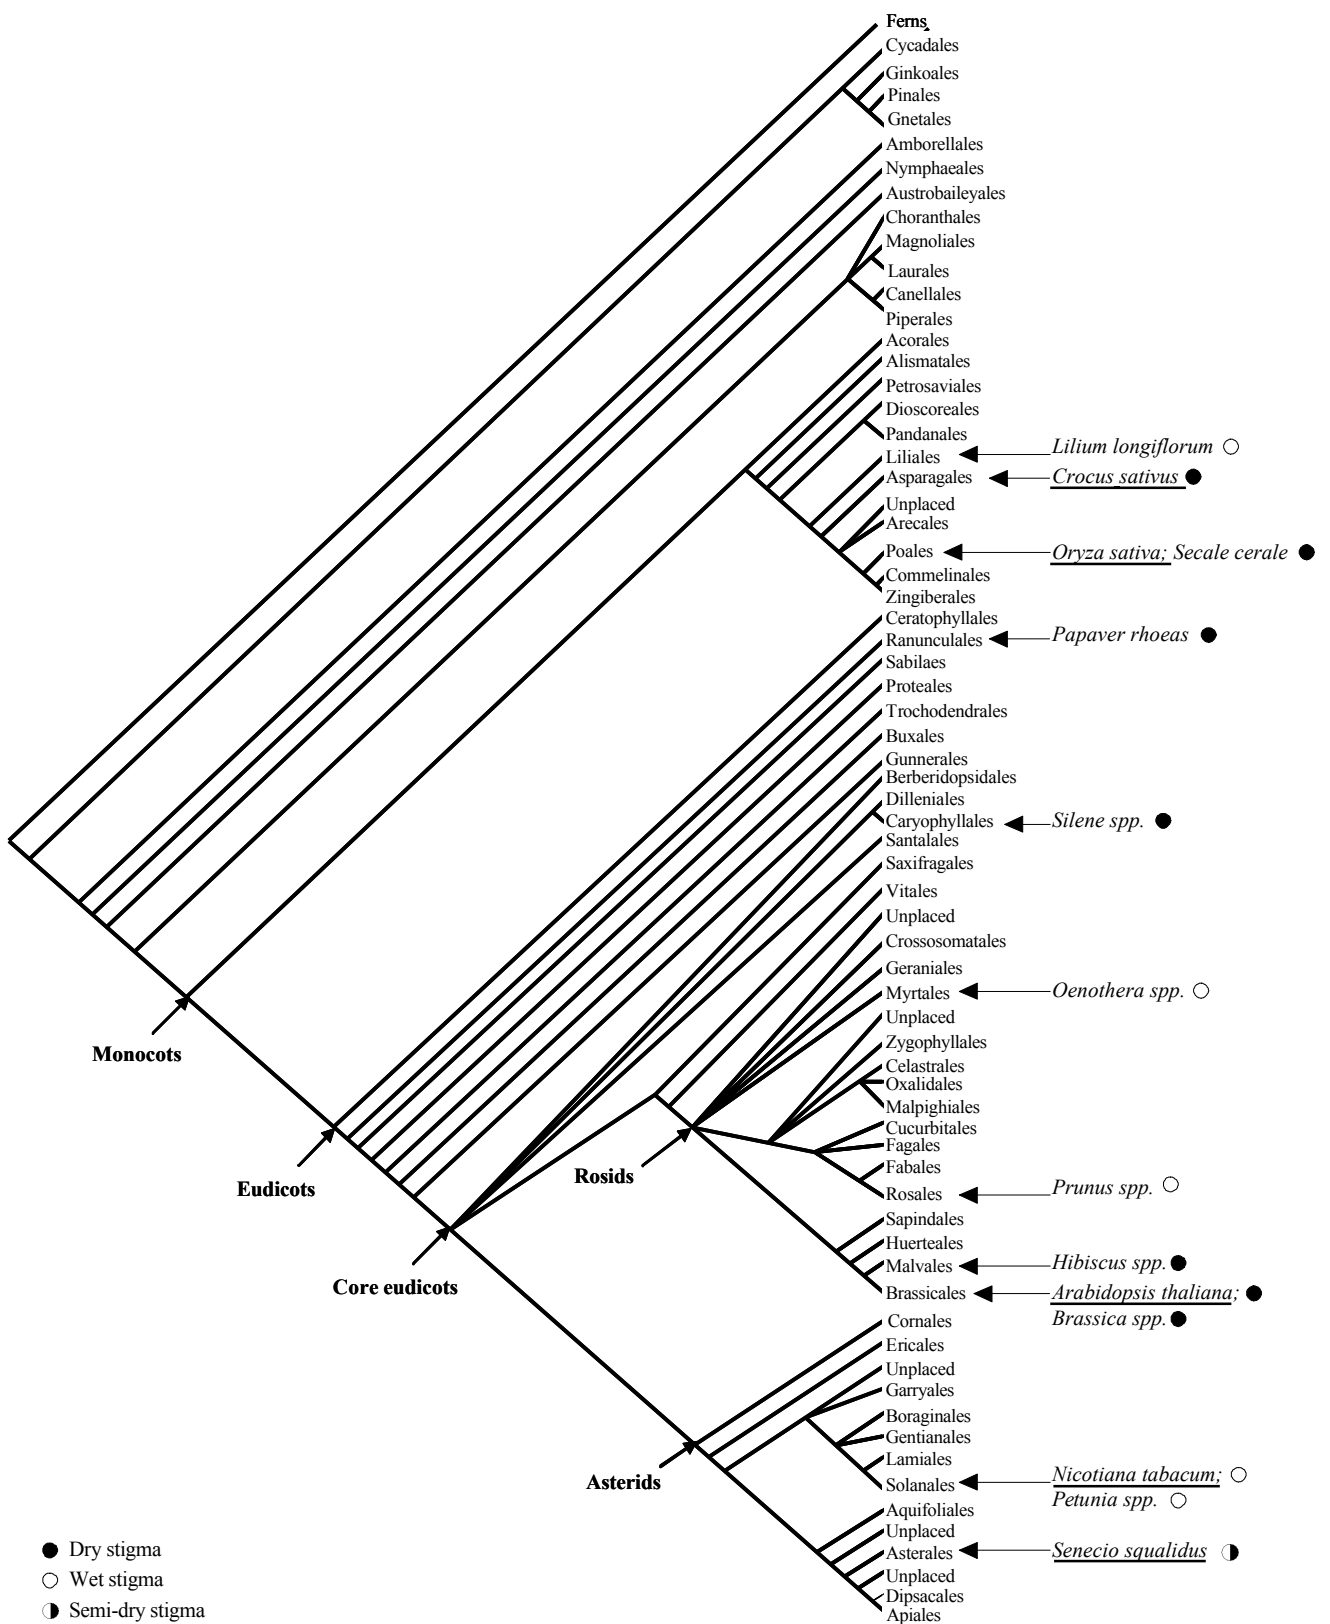

**Figure S1.** The phylogenetic distribution of species most widely used in studies of pollen-pistil interactions. The species for which pistil transcriptome data have been produced are underlined. The stigma state is indicated next to the species. The tree is based on APG II (2003).
